# Supplementary material
Source: HighWire-hosted journal article supplement (doi:10.1101/rna.079043.121)
Supplement: Supplemental_Information_.docx [file Supplemental_Information_.docx]

**Identification and mapping of post-transcriptional modifications on the**

**HIV-1 antisense transcript *Ast* in human cells**

Mariana Estevez1*, Rui Li2*, Biplab Paul3, Kaveh Daneshvar3, Alan C. Mullen3,

Fabio Romerio2§, and Balasubrahmanyam Addepalli1§

1 Department of Chemistry, University of Cincinnati, Cincinnati, OH

2 Department of Molecular and Comparative Pathobiology,

Johns Hopkins University School of Medicine, Baltimore, MD

3 Massachusetts General Hospital, Boston, MA

* These authors contributed equally to this work.

§ Correspondence: Balasubrahmanyam Addepalli, [balasual@ucmail.uc.edu](mailto:balasual@ucmail.uc.edu); Fabio Romerio, [fromeri2@jhmi.edu](mailto:fromeri2@jhmi.edu).

**Supplemental Table ST1:** Sequence and position on *Ast* sequence of biotinylated oligonucleotides used for purification of *Ast* from total RNA obtained from J-AST cells.

| **Start position of *Ast* RNA** | **Oligodeoxyribonucleotide Sequence** |
| --- | --- |
| 171 | Biotin-5’-GTTACACCCTGTGAGCCTGCATGGA |
| 571 | Biotin-5’-GAGCAGTATCTCGAGACCTAGAAAA |
| 971 | Biotin-5’-TTATCTGGGACGATCTGCGGAGCCT |
| 1371 | Biotin-5’-ATTTGGAATAACATGACCTGGATGG |
| 1770 | Biotin-5’-GTAAAAATTGAACCATTAGGAGTAG |
| 2163 | Biotin-5’-ACAATAATCTTTAAGCAATCCTCAG |

**Supplementary Table ST2:** List of ribonucleoside modifications observed in *Ast* RNA expressed as fusion sequence with streptavidin aptamer (4×S1m) at 5’ end (4×S1m-AST) or 3’ end (AST-4×S1m). * Confirmed based on retention time and *m/z* values at nucleoside level.

| **Name** | **Symbol** | ***m/z* (M+H+)** | **RT (min)** | |
| --- | --- | --- | --- | --- |
| **4×S1m-AST** | **AST-4×S1m** |
| Cytidine | C | 244.0933 | 2.3 | 2.4 |
| 5-methylcytidine | m5C | 258.1082 | 4.9 | 5.1 |
| 2’-*O*-methylcytidine | Cm | 258.1082 | 6.9 | 7.2 |
|  | | | |  |
| Uridine | U | 245.0773 | 3.3 | 3.4 |
| Pseudouridine | Ψ | 245.0773 | 1.6 | 1.7 |
| 3-methyluridine / | m3U/Um | 259.093 | 13.1 | 13.5 |
| 2’-*O*-methyluridine* |
|  | | | |  |
| Guanosine | G | 284.0995 | 9.3 | 9.4 |
| 7-methylguanosine* | m7G | 298.1151 | 7.6 | 7.7 |
| 2-methylguanosine | m2G | 298.1151 | 21.5 | 21.7 |
| 2’-*O*-methylguanosine | Gm | 298.1151 | 18.3 | 18.6 |
|  | | | |  |
| Adenosine | A | 268.1046 | 21.7 | 21.9 |
| 1-methyladenosine | m1A | 282.1202 | 4.2 | 4.4 |
| Inosine | I | 269.0886 | 8.2 | 8.4 |
| 2’-*O*-methyladenosine | Am | 282.1195 | 29.7 | 29.8 |
| N6-methyladenosine | m6A | 282.1202 | 31.4 | 31.4 |

**Supplemental Table ST3:** Modified oligonucleotides of Ast RNA detected by digestion with cusativin

| **Position on** | **PTM** | **ODP** |
| --- | --- | --- |
| ***Ast* sequence** |
| 173 | Am | AGGGUGUA[Am]C>p |
| 708 | Gm | AG[Gm]UAU>p |
| 1027 | I | UCC[I]CC>p |
| 1636 | m3U/Um | U[m3U/Um]GAC>p |
| 2541 | mA | UGA[Am]CG>p |

**Supplemental Table ST4:** Oligonucleotide mapping to multiple positions in the sequence.

| **Sequence location** | **PTM** | **Oligonucleotide** |
| --- | --- | --- |
| 50 | Am/mA | C[Am/mA]G |
| 73 |
| 157 |
| 507 |
| 624 |
| 959 |
| 1420 |
| 1883 |
| 2416 |
| 2462 |

|  |  |  |
| --- | --- | --- |

**Supplemental Figure Legends.**

**Supplemental Figure S1.** Confirmation of purified RNA as *Ast* by DNA sequencing of the RT-PCR product. (A) Agarose gel electrophoresis of the amplification product after RT-PCR of purified *Ast* RNA. Lanes 1-4 represent the templates used in RT-PCR reaction. Lanes Size Std: 1 kb ladder, 1: Total RNA, lane 2: DNase treated total RNA, 3: purified *Ast* RNA treated with RNase T1, 4: *Ast* RNA template. (B) Sequence of the RT-PCR products from total RNA and isolated *Ast* RNA match the expected sequence of *Ast*.

**Supplemental Figure S2**: Mass spectra of cytidine and uridine modifications. **A** (i) Both 5-methylcytidine (m5C) and 2’-O-methylcytidine (Cm) exhibited identical molecular ion (*m/z* 258.1085). (ii) Presence of Cm is confirmed by the HCD-based MS/MS spectrum of molecular ion (*m/z* 258.1), where cytosine-specific fragment ions were observed following loss of 2’-O-methylated ribose (-146 Da). **B** (i) Mass spectrum of pseudouridine (Ψ), and (ii) methylated uridine are shown. **C** HCD-based MS/MS spectrum of Ψ depicting the presence of specific fragment ions.

**Supplemental Figure S3**: Mass spectra of guanosine and adenine modifications. **A** (i) Guanosine modifications, 7-methylguanosine (m7G) or 2’-O-methylguanosine (Gm) or 2-methylguanosine (m2G) exhibited identical mass spectrum. (ii) HCD-based MS/MS spectrum of *m/z* 298.11 depicting the m7G-specific (top panel) or Gm-specific (bottom panel) fragment ions following loss of ribose (132 Da) or 2’-O-methylated ribose (146 Da), respectively. **B** (i) Adenosine with singly methyl group exhibited identical mass spectrum. (ii) HCD-based MS/MS spectrum of Am (loss of 2’-O-methylated ribose (146 Da)) (top) or m6A (loss of ribose (132 Da) (bottom) are shown. **C** Mass spectrum of inosine (*m/z* 269.0881) is shown.

**Supplemental Figure S4** LC-MS based detection of methyluridine from increased amount of *Ast* RNA digests. Extracted ion chromatogram for *m/z* 259.147 corresponding to 3-methyluridine and/or 2’-O-methyluridine (m3U and Um, respectively), from 2 µg (top two panels), 3 µg (third panel from top) and 6 µg (bottom panel) of *Ast* RNA hydrolysate.

**Supplemental Figure S5.** Comparison of the LC-MS signal corresponding to N6, N6-dimethyladenosine (m6,6A) from purified Ast RNA and rRNA ribonucleosides.

**Supplemental Figure S6.** Expression of *Ast* in Jurkat cells stably transduced with a lentiviral vector expressing *Ast* fused to 4×S1m at the 3’ end (J-AST-4×S1m). Total RNA was extracted from the J-AST-4×S1m cell line, as well as from parental Jurkat cells, and from Jurkat cells stably transduced with lentivirus expressing a control RNA sequence (SCRM) fused to 4×S1m at the 3’ end (J-SCRM-4×S1m). Two hundred nanograms of total RNA were reverse transcribed and subjected to quantitative PCR as described in Materials and Methods. The figure shows mean and standard deviation results from three independent RNA extraction and RT-qPCR experiments for each of the three cell lines. Individual data points are shown as black dots.

**Supplementary Figure S7.** Agarose gel electrophoresis of *Ast* RNA-4xs1m. *Ast* RNA-4xs1m preparation purified using Streptavidin Magnetic beads (lane labeled as Ast) was electrophoresed on an agarose gel along with RNA size standards (Size std). The slow and fast-migrating bands in the streptavidin-enriched lane are consistent with the pattern observed in Figure 1. However, reasons for slower than expected migratory behavior of Ast RNA (indicated as Full by an arrow) with streptavidin aptamer is not known.

**Supplementary Figure S8.** Extracted ion chromatograms (XICs) of *Ast* RNA ribonucleoside modifications (indicated by *m/z* value and short name) when expressed as fusion sequence with streptavidin aptamer (4xS1m) at the 5’ end (4×S1m-AST) or 3’ end (AST-4×S1m). **A**. Cytidine modifications, **B**. Uridine modifications, **C**. Guanosine modifications, **D**. Adenosine modifications.

**Supplemental Figure S9.** LC-MS based detection of UU[Gm]CGp from *Ast* RNA. Extracted ion chromatogram for m/z 818.59 (top panel). Tandem mass spectrum of oligonucleotide anion (*m/z* 818.59) with all the observed sequence informative fragment ions (bottom panel). Fragmentation pattern of the oligomer is depicted.

**Supplemental Figure S10:** LC-MS based detection of A[Am]CGp from *Ast* RNA. Extracted ion chromatogram for *m/z* 1339.210 (top panel). Tandem mass spectrum of oligonucleotide anion (*m/z* 1339.210) with all the observed sequence informative fragment ions (bottom panel). Fragmentation pattern of the oligomer is depicted.

**Supplemental Figure S11:** LC-MS based detection of [Gm]UAUGp from Ast RNA. Extracted ion chromatogram for *m/z* 830.574 (top panel). Tandem mass spectrum of oligonucleotide anion (*m/z* 830.574) with all the observed sequence informative fragment ions (bottom panel). Fragmentation pattern of the oligomer is depicted.

**Supplemental Figure S12:** LC-MS based detection of AAA[Cm/m5C]Gp from *Ast* RNA. Extracted ion chromatogram for *m/z* 833.624 (top panel). Tandem mass spectrum of oligonucleotide anion (*m/z* 833.624) with all the observed sequence informative fragment ions (bottom panel). Fragmentation pattern of the oligomer is depicted.

**Supplemental Figure S13:** LC-MS based detection of AU[m5C]UCGp from *Ast* RNA. Extracted ion chromatogram for *m/z* 963.120 (top panel). Tandem mass spectrum of oligonucleotide anion (*m/z* 963.120) with all the observed sequence informative fragment ions (bottom panel). Fragmentation pattern of the oligomer is depicted. Loss of methylated base but not the unmethylated cytidine noticed.

**Supplemental Figure S14:** LC-MS based detection of CUCUAC[Ψ]AAUGp from *Ast* RNA. Extracted ion chromatogram for *m/z* 1179.804 (top panel). Tandem mass spectrum of oligonucleotide anion (*m/z* 1179.804) with all the observed sequence informative fragment ions (bottom panel. Fragmentation pattern of the oligomer is depicted.

**Supplemental Figure S15.** LC-MS based detection of U[Um/m3U]GAC>p from *Ast* RNA. Extracted ion chromatogram for *m/z* 801.629 (top panel). Tandem mass spectrum of oligonucleotide anion (*m/z* 801.629) with all the observed sequence informative fragment ions (bottom panel). Fragmentation pattern of the oligomer is depicted.

**Supplemental Figure S16.** Secondary structure of *Ast* RNA with 4×S1m aptamer sequence at the 3’ end (indicated by gray dashed line) generated with RNA Fold WebServer. The color scale represents the probability of base pairing from 0 to 1.
